# Supplementary material
Source: Springer Nature journal article supplement (https://www.springermedizin.de/resource/supplementary/13601_2013_656_MOESM4_ESM.pdf/9678650)

**A****Period 1**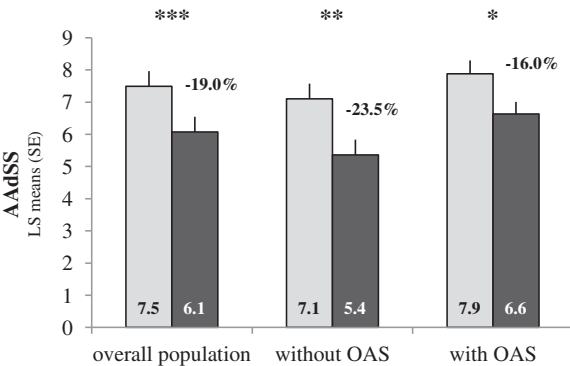**B****Period 2**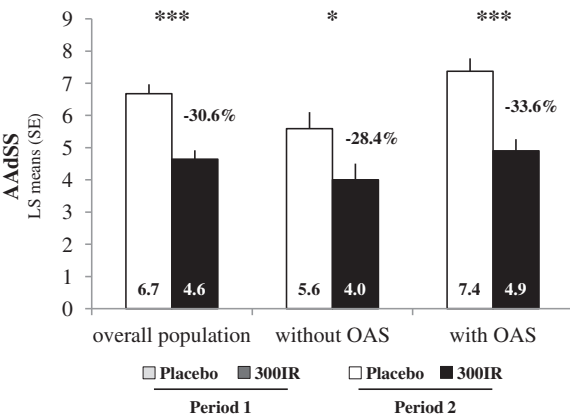

Supplement: MOESM4 [file 9678650]
